# Supplementary material
Source: Springer Nature journal article supplement (https://www.springermedizin.de/resource/supplementary/12885_2009_2800_MOESM7_ESM.pdf/9461954)

MMP-9

MMP-2

MCF-7

MCF-7+HA

MCF-7/pcDNA3.1

MCF-7/CD44st

MCF-7/CD44st+HA

MCF-7/CD44st  
+Anti-CD44+HA

Positive control

Marker

83KD

62KD

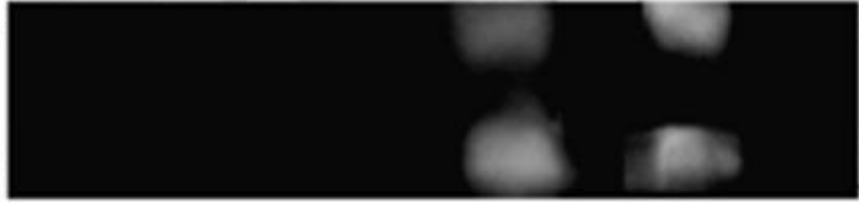

Supplement: MOESM7 [file 9461954]
